# Supplementary material
Source: PubMed Central journal article supplement (PMC7886007)
Supplement: NIHMS1642647-supplement-Supplemental_Material.pdf [file NIHMS1642647-supplement-Supplemental_Material.pdf]

## **SUPPLEMENTAL MATERIAL**

### **Non-conserved lincRNAs associate with complex cardiometabolic disease traits**

Andrea S Foulkes, ScD<sup>1,2</sup>, Caitlin Selvaggi, MS<sup>1</sup>, Tingyi Cao, BS<sup>1,3</sup>, Marcella E O'Reilly, PhD<sup>5</sup>, Esther Cynn, MS<sup>5</sup>, Puyang Ma, BA<sup>4</sup>, Heidi Lumish, MD<sup>5</sup>, Chenyi Xue, MS<sup>5</sup>, Muredach P Reilly, MBBCh, MSCE<sup>5,6</sup>

<sup>1</sup>Biostatistics, Massachusetts General Hospital, Boston, MA 02114; <sup>2</sup>Department of Medicine, Harvard Medical School, Boston, MA 02114. <sup>3</sup>Department of Biostatistics, Harvard TH Chan School of Public Health, Boston, MA 02115. <sup>4</sup>Data Science, Stanford University, Stanford, CA 94305. <sup>5</sup>Cardiology Division, Department of Medicine and the <sup>6</sup>Irving Institute for Clinical and Translational Sciences, Columbia University, New York, NY 10032.

## Major Resources Table

In order to allow validation and replication of experiments, all essential research materials listed in the Methods should be included in the Major Resources Table below. Authors are encouraged to use public repositories for protocols, data, code, and other materials and provide persistent identifiers and/or links to repositories when available. Authors may add or delete rows as needed.

### Data & Code Availability

| Description                                   | Source / Repository                                                                 | Persistent ID / URL                                                                                                                                                                                     |
|-----------------------------------------------|-------------------------------------------------------------------------------------|---------------------------------------------------------------------------------------------------------------------------------------------------------------------------------------------------------|
| Human lincRNAs and protein coding genes       | Human GENCODE Release 33                                                            | <a href="https://www.encodegenes.org/human/release_33.html">https://www.encodegenes.org/human/release_33.html</a>                                                                                       |
| Mouse lincRNAs and protein coding genes       | Mouse GENCODE Release 24                                                            | <a href="https://www.encodegenes.org/mouse/release_M24.html">https://www.encodegenes.org/mouse/release_M24.html</a>                                                                                     |
| Mouse homologs of human genes                 | Ensembl Biomart                                                                     | <a href="https://www.ensembl.org/biomart/martview/">https://www.ensembl.org/biomart/martview/</a>                                                                                                       |
| RepeatMasker data for calculating TE coverage | UCSC                                                                                | <a href="https://genome.ucsc.edu/cgi-bin/hgTables">https://genome.ucsc.edu/cgi-bin/hgTables</a>                                                                                                         |
| GWAS summary data for WHRadjBMI and BMI       | GIANT & UK BioBank meta-analysis                                                    | <a href="https://zenodo.org/record/1251813#.X3sbzJNKiHG">https://zenodo.org/record/1251813#.X3sbzJNKiHG</a>                                                                                             |
| GWAS summary data for Height                  | GIANT & UK BioBank meta-analysis                                                    | <a href="https://portals.broadinstitute.org/collaboration/giant/index.php/GIANT_consortium_data_files">https://portals.broadinstitute.org/collaboration/giant/index.php/GIANT_consortium_data_files</a> |
| GWAS summary data for CAD                     | CARDIoGRAMplusC4D 1000 Genomes-based GWAS                                           | <a href="http://www.cardiogramplusc4d.org/data-downloads/">http://www.cardiogramplusc4d.org/data-downloads/</a>                                                                                         |
| GWAS summary data for T2D                     | DIAGRAM Consortium T2D GWAS meta-analysis - Adjusted for BMI                        | <a href="https://diagram-consortium.org/downloads.html">https://diagram-consortium.org/downloads.html</a>                                                                                               |
| GWAS summary data for HDL, LDL, TGs           | Global Lipids Genetics Consortium (GLGC) Joint Analysis of Metabochip and GWAS Data | <a href="http://csg.sph.umich.edu/willer/public/lipids2013/">http://csg.sph.umich.edu/willer/public/lipids2013/</a>                                                                                     |

## Materials and Methods

*Pathway analysis.* Gene set enrichment tests and functional categorization of the nearest 5' and 3' protein coding genes (PCG) of conserved (243 genes) and non-conserved (84 genes) lincRNAs significantly associated ( $P < 5 \times 10^{-8}$ ) with WHRadjBMI were interrogated separately using Database for Annotation, Visualization and Integrated Discovery Bioinformatics Resources v6.8 (DAVID) (1, 2) in order to characterize the biological pathways associated with each set of lincRNAs. If genes share similar set of terms, they are most likely involved in similar biological mechanisms. The algorithm groups those related genes based on the agreement of sharing similar annotation terms by Kappa statistics(1, 2). Functional annotations of the PCG near conserved and non-conserved WHRadjBMI-associated lincRNAs were analyzed in the context of several databases, such as the Kyoto Encyclopedia of Genes and Genomes (KEGG; <http://www.genome.ad.jp>), Gene Ontology (GO) terms; Biological Processes, Cellular Component, and Functional Annotation; UP\_Keywords. Findings were consistent across these different databases and annotations therefore we present targeted results for UniProt Keyword (UP\_Keyword) dataset analyses. The cutoff for gene categories was defined at a false discovery rate (FDR) below 0.05.

**Supplement Table I.** Characteristics of lincRNAs that are not classified based on conservation definitions.

| <b>Characteristic*</b>     | <b>Absent PCG neighbors<br/>(n=1313)</b> | <b>Inconsistent PCG rel.<br/>orientation<br/>(n=88)</b> |
|----------------------------|------------------------------------------|---------------------------------------------------------|
| Length                     | 25198 (13900, 66085)                     | 16996 (11840, 27982)                                    |
| GC content                 | 0.411 (0.379, 0.454)                     | 0.457 (0.415, 0.516)                                    |
| Exon Count                 | 3 (2, 6)                                 | 3 (2, 4)                                                |
| TE coverage                | 0.359 (0.176, 0.557)                     | 0.411 (0.201, 0.566)                                    |
| # SNPs <sup>†</sup>        | 271 (144, 667)                           | 168 (118, 289)                                          |
| # SNPs/length <sup>†</sup> | 0.010 (0.009, 0.012)                     | 0.010 (0.008, 0.011)                                    |

\*Median and IQR (25<sup>th</sup>, 75<sup>th</sup>) across lincRNAs within corresponding category. †Summary results for number of SNPs per lincRNA and number of SNPs divided by lincRNA length are based on subset of n=7011 lincRNAs and GWAS SNPs for WHRadjBMI.

**Supplement Table II.** Complete summary of GWAS signals by cardiometabolic trait and conservation

| <b>Conservation defined based on synteny:</b>                |               |                                        |                                     |              |
|--------------------------------------------------------------|---------------|----------------------------------------|-------------------------------------|--------------|
|                                                              |               | <b>No signal<br/>(n, row %, col %)</b> | <b>Signal<br/>(n, row %, col %)</b> | <b>Total</b> |
| WHRadjBMI<br>(n=5635)                                        | Non-conserved | 1315, 94.3%, 24.6%                     | 80, 5.7%, 27.6%                     | 1395         |
|                                                              | Conserved     | 4030, 95.0%, 75.4%                     | 210, 5.0%, 72.4%                    | 4240         |
| BMI<br>(n=5635)                                              | Non-conserved | 1308, 93.8%, 24.9%                     | 87, 6.2%, 23.0%                     | 1395         |
|                                                              | Conserved     | 3949, 93.1%, 75.1%                     | 291, 6.9%, 77.0%                    | 4240         |
| Height<br>(n=5319)                                           | Non-conserved | 968, 83.2%, 22.2%                      | 195, 16.8%, 20.0%                   | 1163         |
|                                                              | Conserved     | 3375, 81.2%, 77.8%                     | 781, 18.8%, 80.0%                   | 4156         |
| HDL<br>(n=5395)                                              | Non-conserved | 1208, 99.0%, 22.6%                     | 12, 1.0%, 29.3%                     | 1220         |
|                                                              | Conserved     | 4146, 99.3%, 77.45                     | 29, 0.7%, 70.7%                     | 4175         |
| LDL<br>(n=5389)                                              | Non-conserved | 1203, 98.8%, 22.5%                     | 14, 1.2%, 36.8%                     | 1217         |
|                                                              | Conserved     | 4148, 99.4%, 77.5%                     | 24, 0.6%, 63.2%                     | 4172         |
| TGs<br>(n=5389)                                              | Non-conserved | 1204, 98.9%, 22.5%                     | 13, 1.1%, 29.5%                     | 1217         |
|                                                              | Conserved     | 4141, 99.3%, 77.5%                     | 31, 0.7%, 70.5%                     | 4172         |
| CAD<br>(n=5534)                                              | Non-conserved | 1301, 99.4%, 23.6%                     | 8, 0.6%, 33.3%                      | 1309         |
|                                                              | Conserved     | 4209, 99.6%, 76.4%                     | 16, 0.4%, 66.7%                     | 4225         |
| T2D<br>(n=5616)                                              | Non-conserved | 1354, 98.4%, 24.4%                     | 22, 1.6%, 31.4%                     | 1376         |
|                                                              | Conserved     | 4192, 98.9%, 75.6%                     | 48, 1.1%, 68.6%                     | 4240         |
| <b>Conservation defined based on synteny and expression:</b> |               |                                        |                                     |              |
|                                                              |               | <b>No signal<br/>(n, row %, col %)</b> | <b>Signal<br/>(n, row %, col %)</b> | <b>Total</b> |
| WHRadjBMI<br>(n=5607)                                        | Non-conserved | 3173, 94.8%, 59.7%                     | 173, 5.2%, 59.9%                    | 3346         |
|                                                              | Conserved     | 2145, 94.9%, 40.3%                     | 116, 5.1%, 40.1%                    | 2261         |
| BMI<br>(n=5607)                                              | Non-conserved | 3115, 93.1%, 59.6%                     | 231, 6.9%, 61.3%                    | 3346         |
|                                                              | Conserved     | 2115, 93.5%, 40.4%                     | 146, 6.5%, 38.7%                    | 2261         |
| Height<br>(n=5292)                                           | Non-conserved | 2481, 81.1%, 57.4%                     | 579, 18.9%, 59.6%                   | 3060         |
|                                                              | Conserved     | 1840, 82.4%, 42.6%                     | 392, 17.6%, 40.4%                   | 2232         |
| HDL<br>(n=5368)                                              | Non-conserved | 3100, 99.1%, 58.2%                     | 28, 0.9%, 68.3%                     | 3128         |
|                                                              | Conserved     | 2227, 99.4%, 41.8%                     | 13, 0.6%, 31.7%                     | 2240         |
| LDL<br>(n=5362)                                              | Non-conserved | 3097, 99.2%, 58.2%                     | 26, 0.8%, 68.4%                     | 3123         |
|                                                              | Conserved     | 2227, 99.5%, 41.8%                     | 12, 0.5%, 31.6%                     | 2239         |
| TGs<br>(n=5362)                                              | Non-conserved | 3094, 99.1%, 58.2%                     | 29, 0.9%, 65.9%                     | 3123         |
|                                                              | Conserved     | 2224, 99.3%, 41.8%                     | 15, 0.7%, 34.1%                     | 2239         |
| CAD<br>(n=5506)                                              | Non-conserved | 3233, 99.5%, 59.0%                     | 17, 0.5%, 70.8%                     | 3250         |
|                                                              | Conserved     | 2249, 99.7%, 41.0%                     | 7, 0.3%, 29.2%                      | 2256         |
| T2D<br>(n=5588)                                              | Non-conserved | 3280, 98.6%, 59.4%                     | 47, 1.4%, 68.1%                     | 3327         |
|                                                              | Conserved     | 2239, 99.0%, 40.6%                     | 22, 1.0%, 31.9%                     | 2261         |

**Supplement Table III.** Distribution of GWAS signals for lincRNAs by conservation classification.

|                       |                                         | <b>No signal<br/>(n, row %, col %)</b> | <b>Signal<br/>(n, row %, col %)</b> | <b>Total</b> |
|-----------------------|-----------------------------------------|----------------------------------------|-------------------------------------|--------------|
| WHRadjBMI<br>(n=5635) | Syntenic or non-syntenic <sup>(a)</sup> | 5345, 94.9%, 79.9%                     | 290, 5.1%, 90.3%                    | 5635         |
|                       | Absent Neighbor <sup>(b)</sup>          | 1269, 98.4%, 19.0%                     | 20, 1.6%, 6.2%                      | 1289         |
|                       | Inconsistent orientation                | 76, 87.4%, 1.1%                        | 11, 12.6%, 3.4%                     | 87           |
| BMI<br>(n=5635)       | Syntenic or non-syntenic                | 5257, 93.3%, 80.7%                     | 378, 6.7%, 75.8%                    | 5635         |
|                       | Absent Neighbor                         | 1178, 91.4%, 18.1%                     | 111, 8.6%, 22.2%                    | 1289         |
|                       | Inconsistent orientation                | 77, 88.5%, 1.2%                        | 10, 11.5%, 2.0%                     | 87           |
| Height<br>(n=5319)    | Syntenic or non-syntenic                | 4343, 81.7%, 78.6%                     | 976, 18.3%, 89.8%                   | 5319         |
|                       | Absent Neighbor                         | 1118, 92.5%, 20.2%                     | 91, 7.5%, 8.4%                      | 1209         |
|                       | Inconsistent orientation                | 63, 75.9%, 1.1%                        | 20, 24.1%, 1.8%                     | 83           |
| HDL<br>(n=5395)       | Syntenic or non-syntenic                | 5354, 99.2%, 80.4%                     | 41, 0.8%, 93.2%                     | 5395         |
|                       | Absent Neighbor                         | 1223, 99.8%, 18.4%                     | 2, 0.2%, 4.5%                       | 1225         |
|                       | Inconsistent orientation                | 83, 98.9%, 1.2%                        | 1, 1.2%, 2.3%                       | 84           |
| LDL<br>(n=5389)       | Syntenic or non-syntenic                | 5351, 99.3%, 80.4%                     | 38, 0.7%, 86.4%                     | 5351         |
|                       | Absent Neighbor                         | 1220, 99.6%, 18.3%                     | 5, 0.4%, 11.4%                      | 1225         |
|                       | Inconsistent orientation                | 83, 98.8%, 1.2%                        | 1, 1.2%, 2.3%                       | 84           |
| TGs<br>(n=5389)       | Syntenic or non-syntenic                | 5345, 99.2%, 80.4%                     | 44, 0.8%, 91.7%                     | 5389         |
|                       | Absent Neighbor                         | 1221, 99.7%, 18.4%                     | 4, 0.3%, 8.3%                       | 1225         |
|                       | Inconsistent orientation                | 84, 100.0%, 1.3%                       | 0, 0.0%, 0.0%                       | 84           |
| CAD<br>(n=5534)       | Syntenic or non-syntenic                | 5510, 99.6%, 80.7%                     | 24, 0.4%, 75.0%                     | 5534         |
|                       | Absent Neighbor                         | 1232, 99.4%, 18.0%                     | 7, 0.6%, 21.9%                      | 1239         |
|                       | Inconsistent orientation                | 85, 98.8%, 1.2%                        | 1, 1.2%, 3.1%                       | 86           |
| T2D<br>(n=5616)       | Syntenic or non-syntenic                | 5546, 98.8%, 80.3%                     | 70, 1.2%, 95.9%                     | 5616         |
|                       | Absent Neighbor                         | 1271, 99.8%, 18.4%                     | 3, 0.2%, 4.1%                       | 1274         |
|                       | Inconsistent orientation                | 87, 100.0%, 1.3%                       | 0, 0.0%, 0.0%                       | 87           |

<sup>(a)</sup>Syntenic and non-syntenic lincRNAs are considered *classified*. <sup>(b)</sup>Absent neighbor lincRNAs are considered *unclassified*.

**Supplement Table IV.** Multivariable adjusted model estimates for effect of classification on GWAS signal by trait

|           | <b>Estimate for classified*</b> | <b>Std. Error</b> | <b>z value</b> | <b>Pr(&gt; z )</b> | <b>OR (95% CI)</b>   |
|-----------|---------------------------------|-------------------|----------------|--------------------|----------------------|
| WHRadjBMI | 1.213                           | 0.238             | 5.091          | 3.557e-7           | 3.363 (2.108, 5.364) |
| BMI       | -0.055                          | 0.121             | -0.457         | 0.648              | 0.946 (0.747, 1.199) |
| Height    | 1.055                           | 0.118             | 8.927          | 4.383e-19          | 2.871 (2.277, 3.619) |

\*Modeling is performed for each trait separately and analysis includes lincRNAs that are classified as syntenic or non-syntenic and lincRNAs that are unclassified, i.e. do not have a neighboring PCG within 900Kb up and/or downstream. LincRNAs with inconsistent orientation between human PCGs and mouse homologs are excluded from this analysis. Analysis is limited to the three traits with GWAS signal in >20 unclassified lincRNAs. P-values correspond to Wald tests of  $H_0: OR=1$  versus the two-sided alternative that the OR is not equal to 1.

**Supplement Table V.** Results of Database for Annotation, Visualization and Integrated Discovery (DAVID) pathway analysis for protein coding genes (PCGs) near conserved and non-conserved lincRNAs associated with WHRadjBMI: Results for UniProt Keyword (UP\_Keyword) annotations are presented.

(A) DAVID pathway analysis for PCGs near conserved WHRadjBMI-associated lincRNAs.

| Term                      | Count | %     | P-Value  | List Total | Pop Hits | Pop Total | Fold Enrichment | Bonferroni | Benjamini | FDR      |
|---------------------------|-------|-------|----------|------------|----------|-----------|-----------------|------------|-----------|----------|
| DNA-binding               | 60    | 24.49 | 5.53E-11 | 243        | 2050     | 20581     | 2.4788919       | 1.47E-08   | 1.48E-08  | 1.41E-08 |
| Developmental protein     | 36    | 14.69 | 1.95E-09 | 243        | 949      | 20581     | 3.21289467      | 5.18E-07   | 2.60E-07  | 2.48E-07 |
| Transcription regulation  | 57    | 23.27 | 1.28E-07 | 243        | 2332     | 20581     | 2.07017237      | 3.40E-05   | 9.00E-06  | 8.59E-06 |
| Transcription             | 58    | 23.67 | 1.35E-07 | 243        | 2398     | 20581     | 2.04851437      | 3.58E-05   | 9.00E-06  | 8.59E-06 |
| Nucleus                   | 97    | 39.59 | 7.86E-07 | 243        | 5244     | 20581     | 1.56664014      | 2.09E-04   | 4.19E-05  | 4.01E-05 |
| Homeobox                  | 15    | 6.122 | 2.90E-06 | 243        | 262      | 20581     | 4.84897748      | 7.72E-04   | 1.29E-04  | 1.23E-04 |
| Activator                 | 23    | 9.388 | 1.23E-05 | 243        | 661      | 20581     | 2.9470437       | 3.27E-03   | 4.69E-04  | 4.48E-04 |
| Alternative splicing      | 155   | 63.27 | 7.87E-05 | 243        | 10587    | 20581     | 1.23999229      | 2.07E-02   | 2.63E-03  | 2.51E-03 |
| Phosphoprotein            | 126   | 51.43 | 1.60E-04 | 243        | 8246     | 20581     | 1.29415834      | 4.18E-02   | 4.76E-03  | 4.54E-03 |
| Chromosomal rearrangement | 13    | 5.306 | 6.29E-04 | 243        | 334      | 20581     | 3.2965304       | 1.54E-01   | 1.68E-02  | 1.60E-02 |
| Disease mutation          | 48    | 19.59 | 0.00111  | 243        | 2550     | 20581     | 1.59426773      | 2.57E-01   | 2.70E-02  | 2.58E-02 |
| Repressor                 | 17    | 6.939 | 0.0018   | 243        | 592      | 20581     | 2.43213352      | 3.81E-01   | 4.01E-02  | 3.83E-02 |

(B) DAVID pathway analysis for PCGs near non-conserved WHRadjBMI-associated lincRNAs.

| Term          | Count | %    | P-Value  | List Total | Pop Hits | Pop Total | Fold Enrichment | Bonferroni | Benjamini | FDR      |
|---------------|-------|------|----------|------------|----------|-----------|-----------------|------------|-----------|----------|
| MHC I         | 7     | 8.24 | 7.42E-13 | 84         | 10       | 20581     | 171.5083333     | 1.16E-10   | 1.16E-10  | 1.1E-10  |
| Immunity      | 12    | 14.1 | 5.20E-06 | 84         | 500      | 20581     | 5.880285714     | 8.15E-04   | 4.08E-04  | 3.82E-04 |
| Cell division | 8     | 9.41 | 9.73E-04 | 84         | 388      | 20581     | 5.051791851     | 1.42E-01   | 4.56E-02  | 4.27E-02 |
| Chromosome    | 8     | 9.41 | 1.16E-03 | 84         | 400      | 20581     | 4.900238095     | 1.67E-01   | 4.56E-02  | 4.27E-02 |



**Supplement Figure I: Schematic illustration of synteny definition and analytic pipeline.**

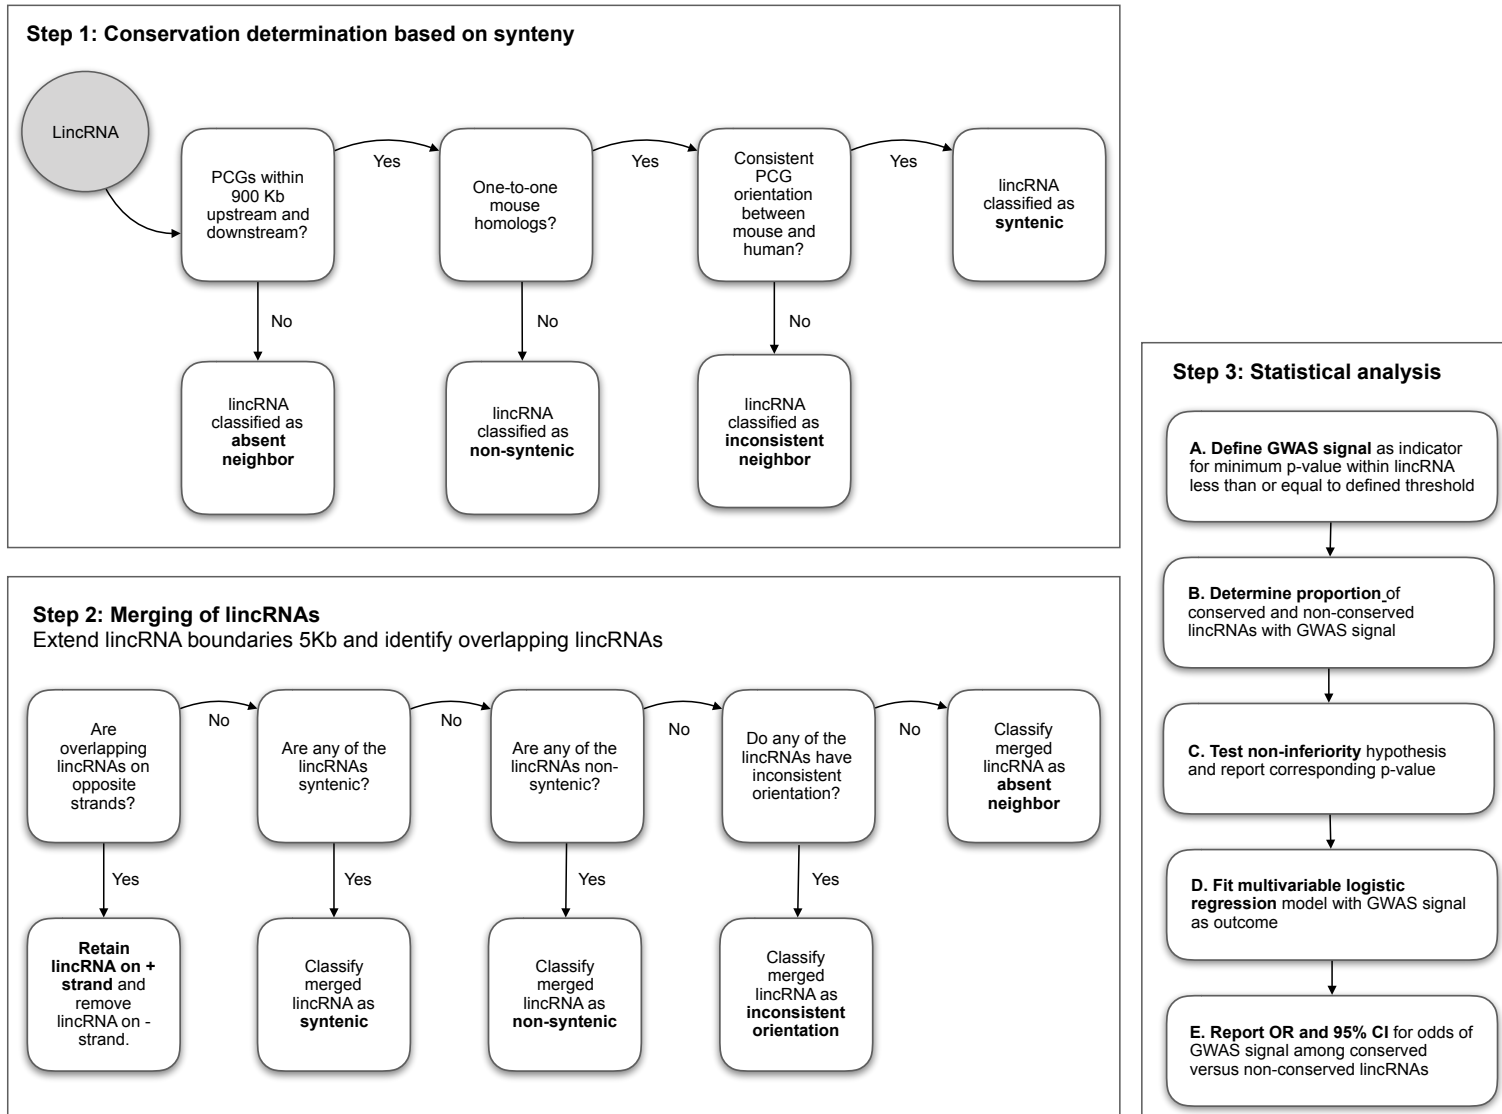

## Supplement Figure II: Predicted probabilities of GWAS signals by number of SNPs and each cardiometabolic trait

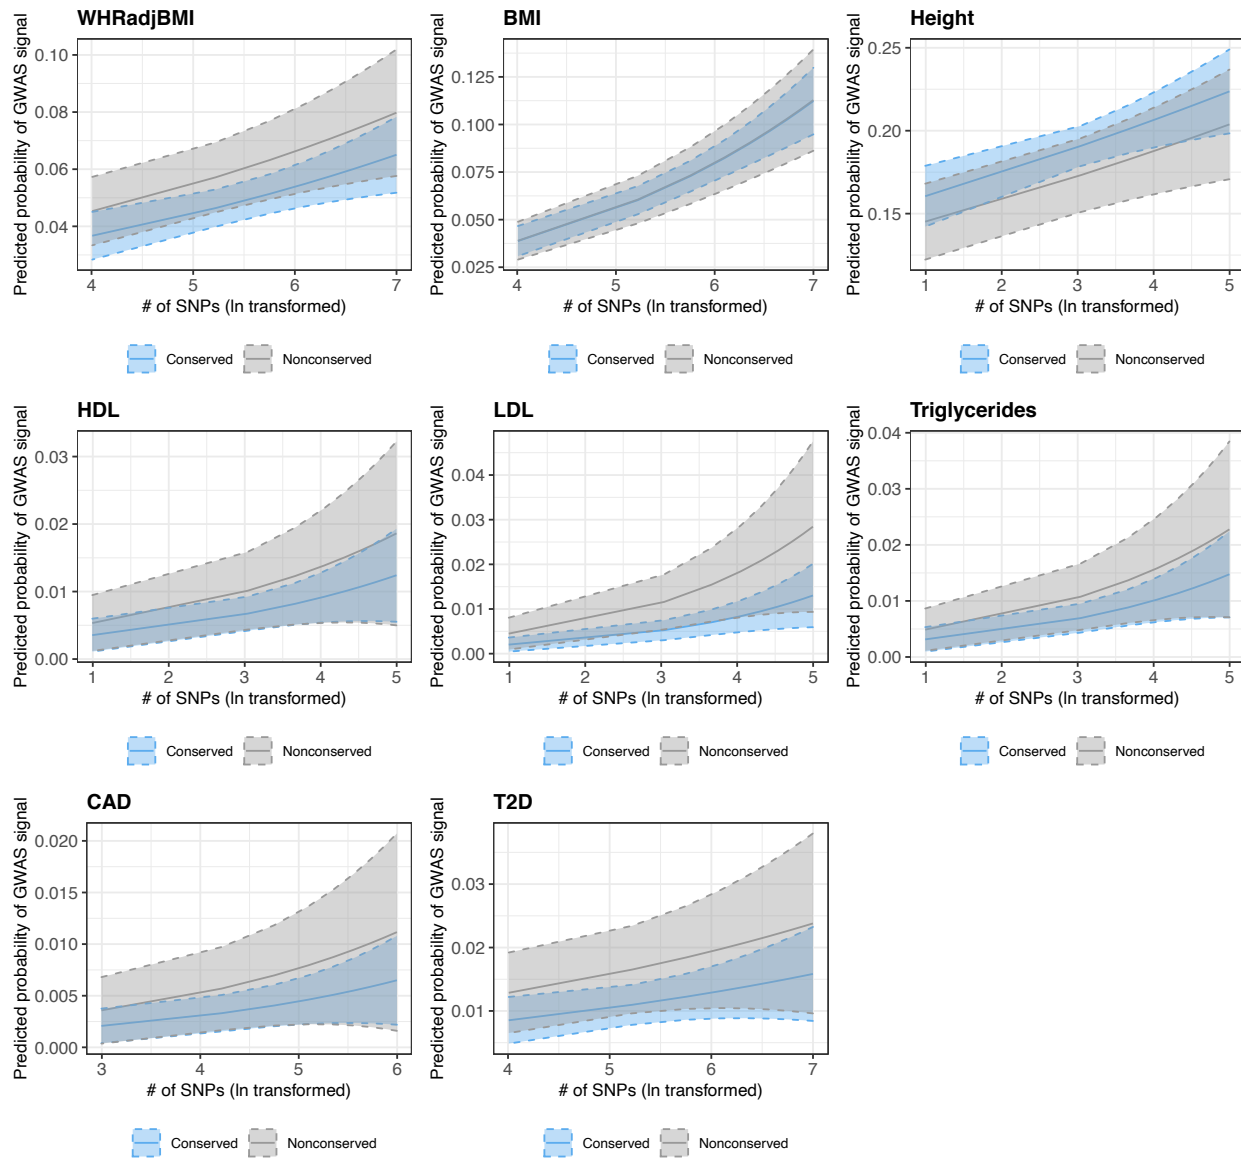

Multivariable model-based predictions of the probability of GWAS signals and corresponding prediction intervals are derived separately for each trait (see Table 3a). Median values for all covariates are used as model inputs. As shown, the predicted probability of GWAS signals increases with the number of SNPs and tends to be greater for non-conserved lincRNAs compared to conserved lincRNAs for all traits with the exception of height. Results are based on the primary definition of conservation.

**Supplement Figure III.** Odds ratio (OR) of GWAS signals for conservation relative to non-conservation of lincRNAs based on multivariable models for two definitions of conservation

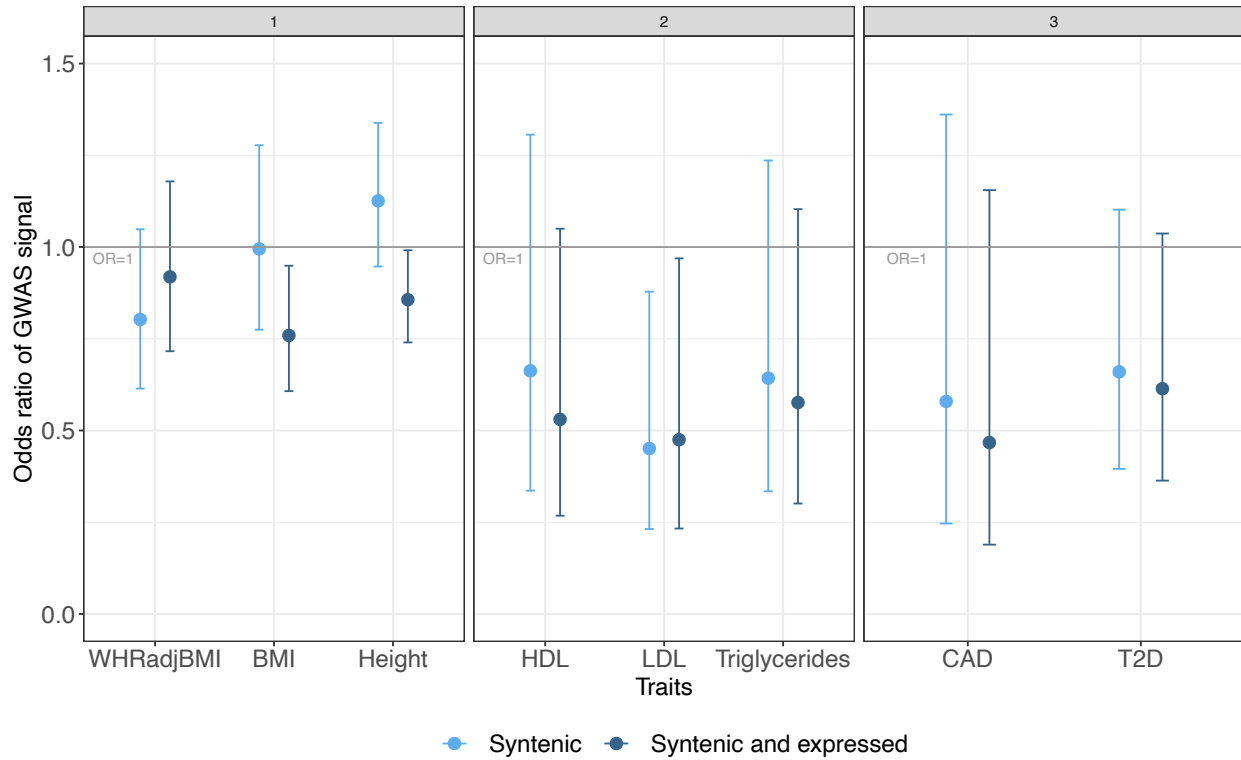

In this figure, “Syntenic” (light blue) indicates the OR of GWAS signals for conservation relative to non-conservation of lincRNAs based on the primary definition of conservation (syntenic vs. non-syntenic) and “Syntenic and expressed” (dark blue) indicates the OR of GWAS signals for conservation relative to non-conservation of lincRNAs based on the secondary definition of conservation (syntenic and expressed vs. non-syntenic or syntenic and not expressed).

**Supplement Figure IV.** Locus zoom plots of non-conserved (i and iii) and conserved (ii and iv) lincRNAs at loci with genome-wide significance for (A) coronary artery disease (CAD) and (B) waist-to-hip ratio adjusted for BMI (WHRadjBMI).

(A) Coronary artery disease (CAD)

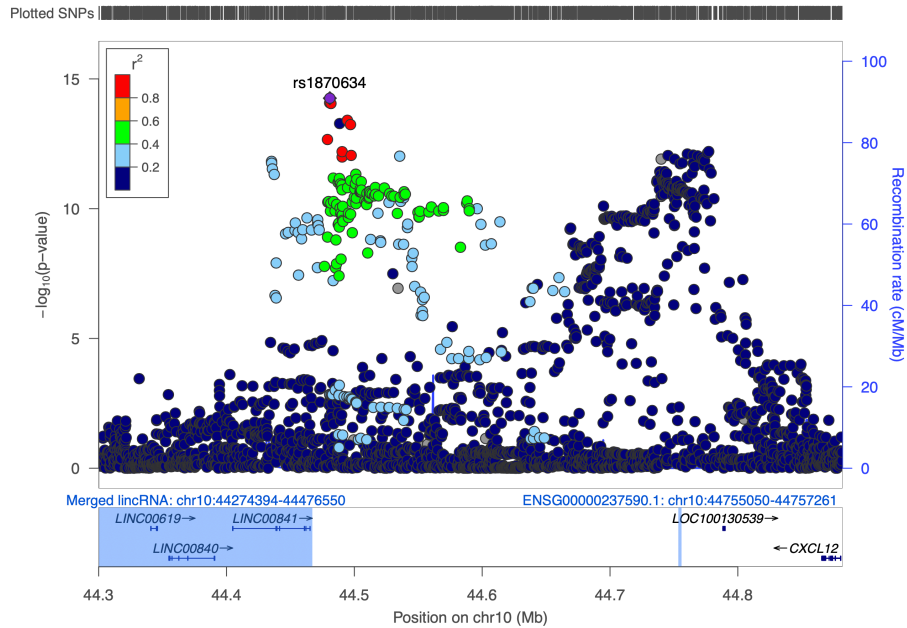

(i) Several non-conserved lincRNAs (merged lincRNA chr10:44274394-44476550 and ENSG00000237590) at the CXCL12 locus for CAD. Although CXCL12 has been implicated through functional studies as a potentially causal protein coding gene (PGC) at this locus, the non-conserved lincRNAs are candidate regulators of CXCL12 expression and CAD association at this locus.

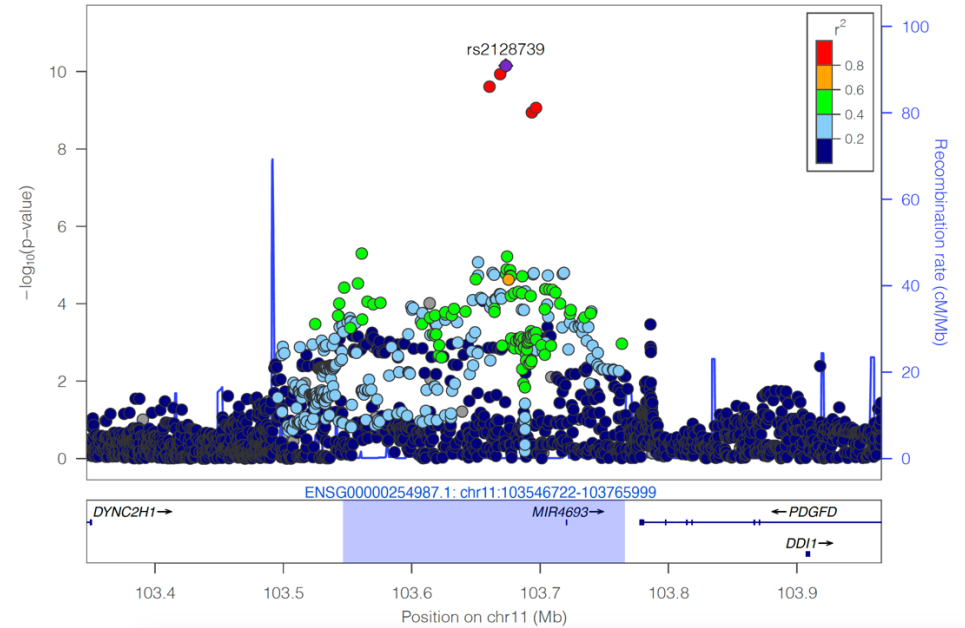

(ii) Conserved lincRNA (ENSG00000254987.1) at the PDGFD locus for CAD, along with 200kb upstream and downstream regions. Although PDGFD is a strong candidate PCG at this locus, it is downstream of the GWAS signal at the locus, while ENSG00000254987.1 overlaps the GWAS signal and is a candidate for CAD association, possibly via regulation of PDGFD expression.

(B) Waist to hip ratio adjusted for BMI (WHRadjBMI)

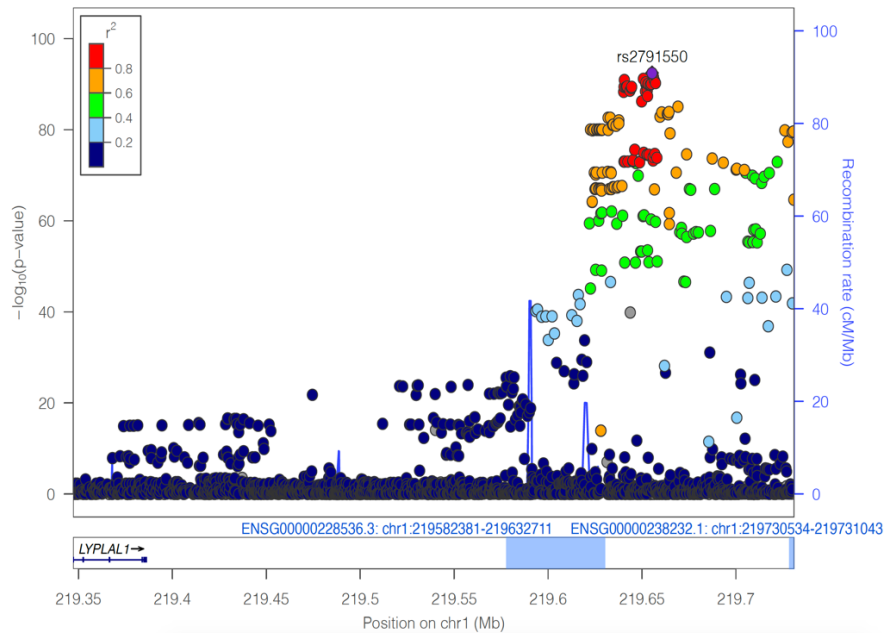

(i) Non-conserved lincRNAs (ENSG00000228536 and ENSG0000023832.1) at the LYPLAL1 locus for WHRadjBMI. Despite functional studies, regional PCGs, including LYPLAL1, have not been implicated as causal at this locus. The non-conserved lincRNAs are strong candidates for WHRadjBMI association at this locus

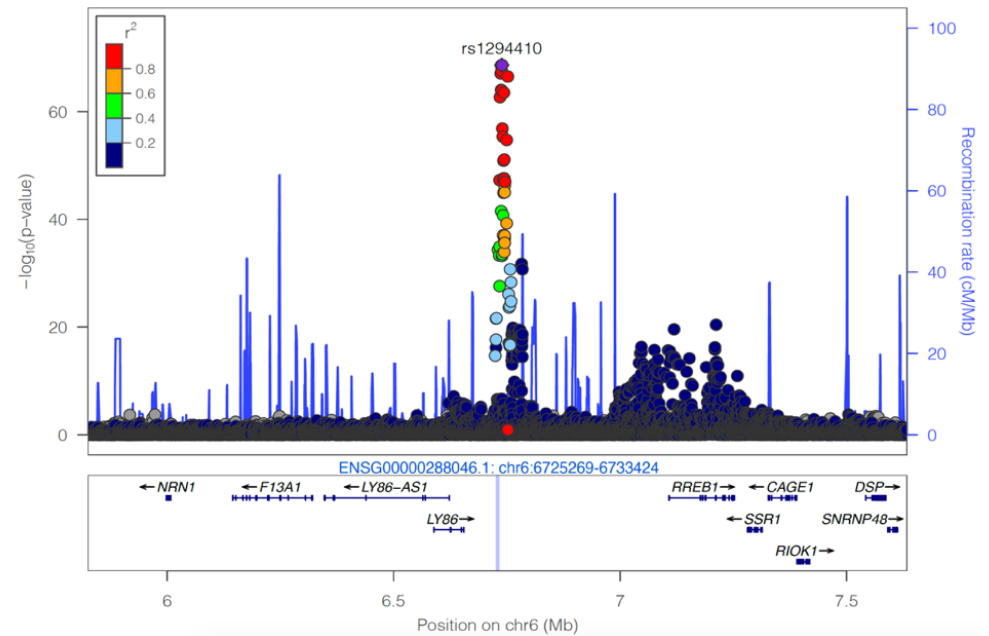

(ii) Conserved lincRNA (ENSG00000288046.1) at the LY86 locus for WHRadjBMI. There are multiple PCGs at this obesity locus but ENSG00000288046.1 is a strong candidate based on its proximity to and overlap with the GWAS signal.

**Supplement Figure V.** Truncated distributions of GWAS test statistics by the primary syntenic definition of conservation.

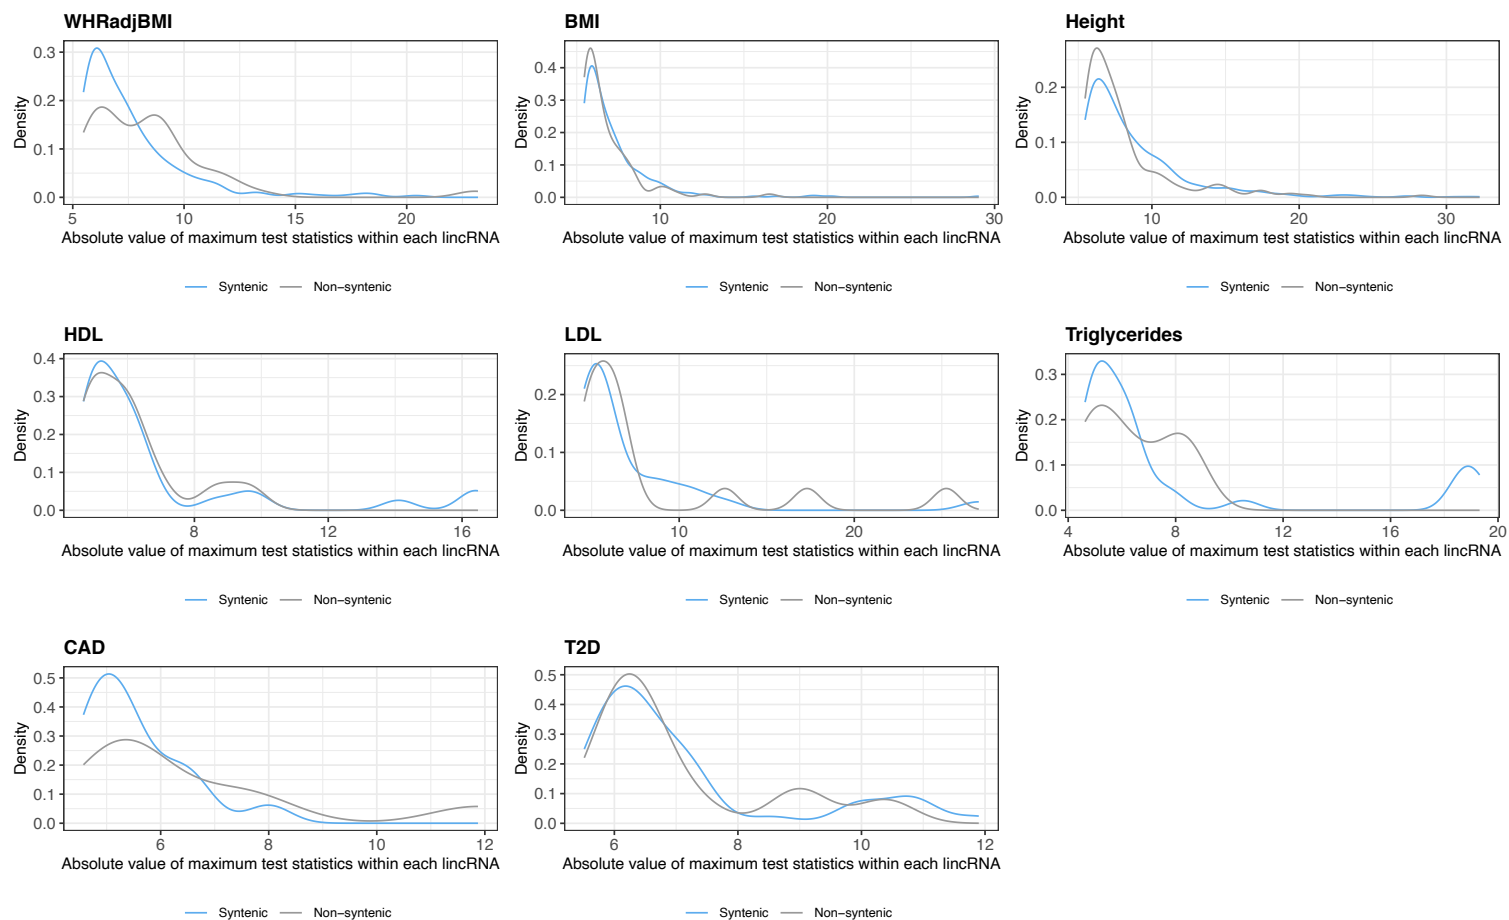

Density plots of the maximum absolute SNP-level z-score within signal lincRNAs. No apparent difference is observed in the density for conserved and non-conserved. This suggests that the magnitude of the signal in conserved lincRNAs is not greater than in non-conserved lincRNAs.

**Supplement Figure VI.** Distribution of phastCons scores for lincRNAs by GWAS signals for WHRadjBMI.

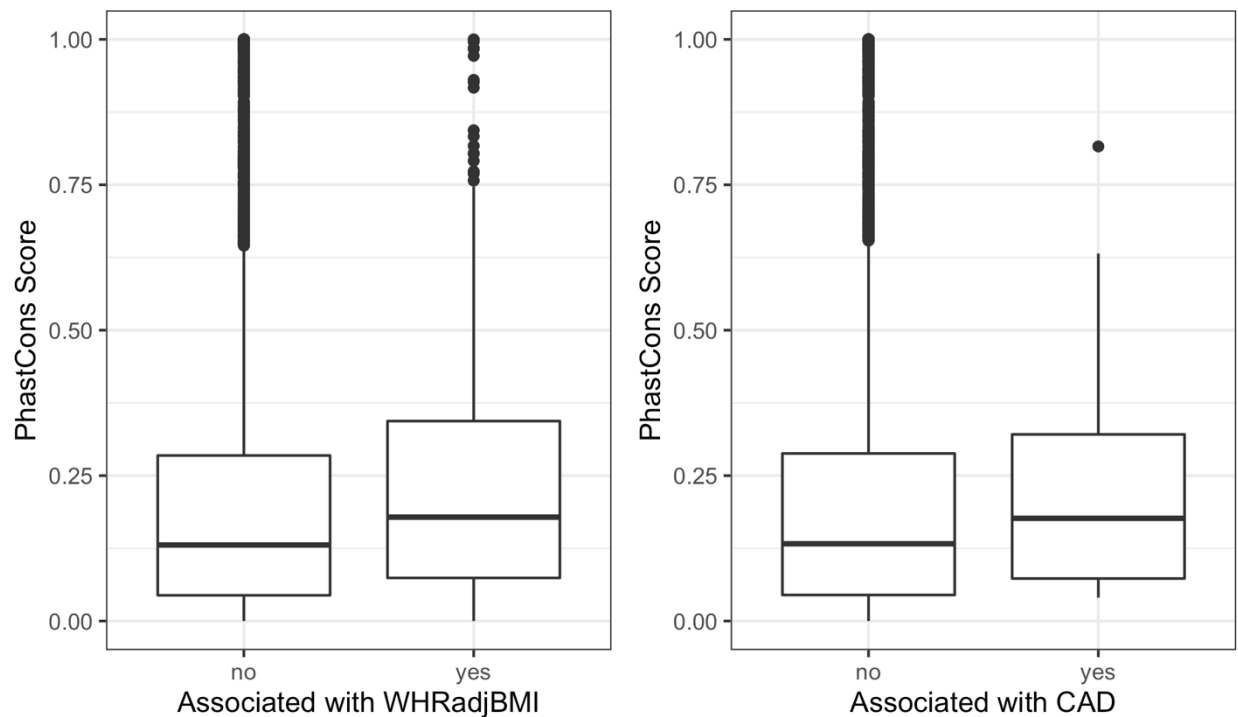

The median phastCons score is higher in lincRNAs associated with WHRadjBMI compared to lincRNAs not associated with WHRadjBMI (Wilcoxon rank sum test p-value<0.001, left hand panel). There is no detectable difference in the median phastCons score for lincRNAs associated with CAD compared to lincRNAs not associated with CAD (Wilcoxon rank sum test p-value=0.310, right hand panel). Overall, the median phastCons scores for WHRadjBMI and CAD associated lincRNAs are quite low (<0.2).

## References

1. Huang da W, Sherman BT, Lempicki RA. Bioinformatics enrichment tools: paths toward the comprehensive functional analysis of large gene lists. *Nucleic Acids Res.* 2009;37(1):1-13.
2. Huang da W, Sherman BT, Lempicki RA. Systematic and integrative analysis of large gene lists using DAVID bioinformatics resources. *Nature protocols.* 2009;4(1):44-57.
